# Supplementary material for: Analyses of Molecular Characteristics and Enzymatic Activities of Ovine HSD17B3
Source: MDPI journal article supplement (doi:10.3390/ani11102876), 2021-09-30
Supplement: s1 [file s1]

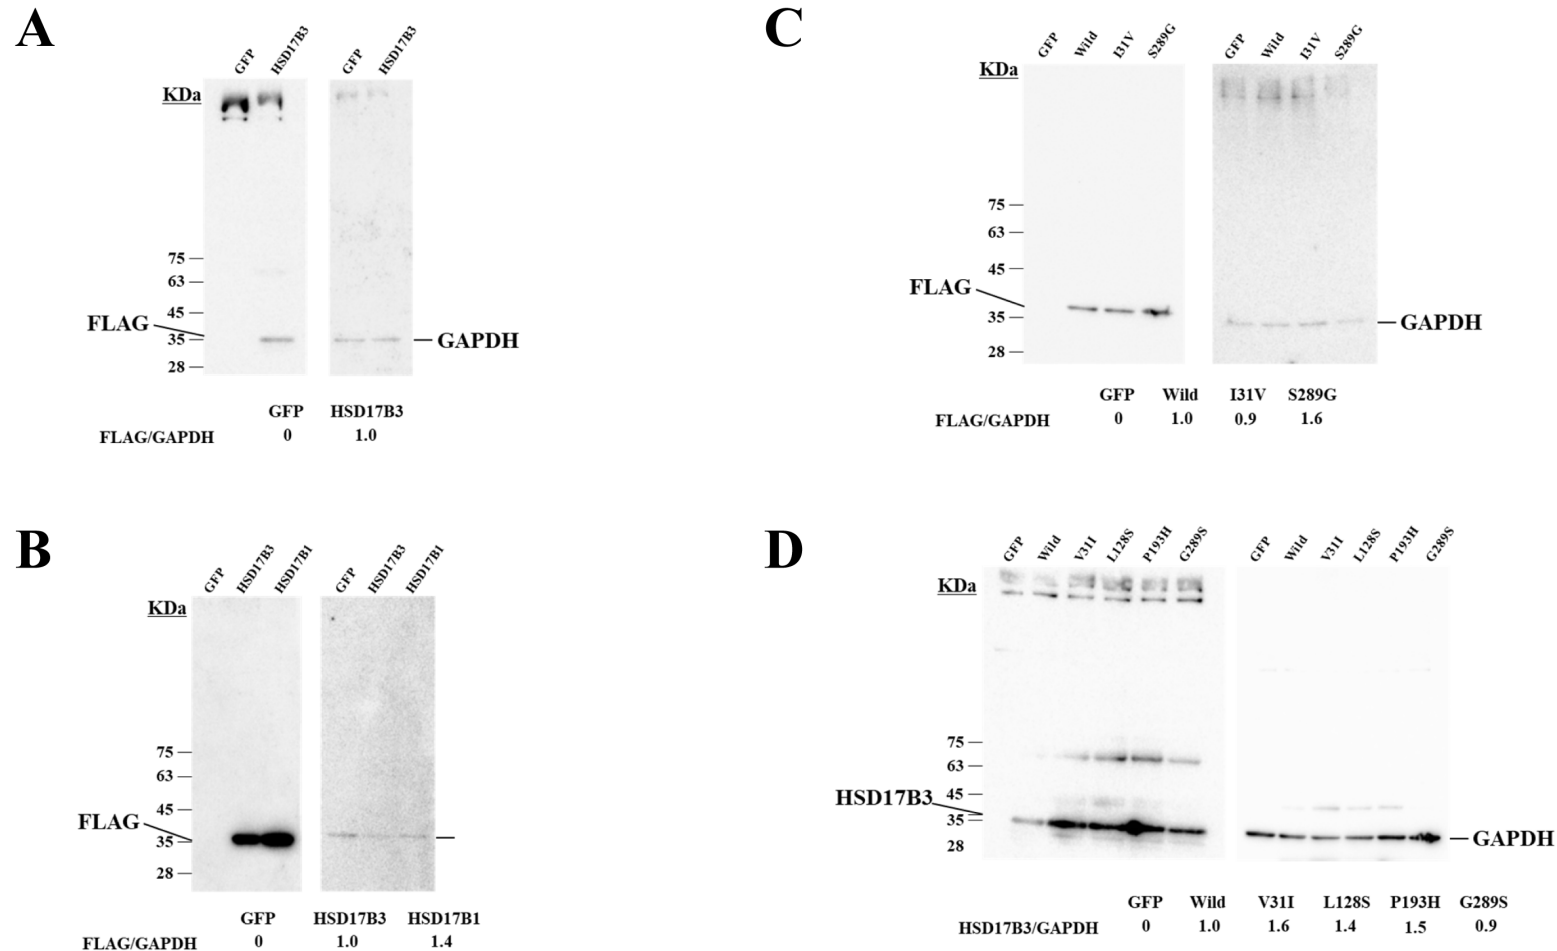

**Figure S1** The whole western blot of Fig 2C (A), Fig. 3A (B), Fig. 4C (C) and Fig. 4D (D). The ratio of intensities of signal quantified by densitometry is presented to the bottom. Values of HSD17B3 or wild type HSD17B3 were defined as 1.

CCAGGTCTGAAACAGCATCTGCCGTGGTGCCATC

1 ATGGAGGAGGTTCCTGGAGCAGTTCTTCATTTTGTAGGGTTGCTG  
M E E V L E Q F F I F V G L L

46 GTTTCCTGGTCTACCTGACGAAATGCGTGAGATTCTCTAAATGC  
V C L V L T K C V R F S K C

91 ATTTTCCTGCACTTCTGAAAGTTTTGCCAAGATCTTCTTGAAG  
I F L H F W K V L P R S F L K

136 TCCATGGGCGAGTGGGCGAGTGACTGAGCAGGAGATGGGATT  
S M G E W A V I T G A G D G I

181 GGGAAAGCTTACTCATTGAGTTAGCAAGACAGGGATTCAATGTC  
G K A Y S F E L A R Q G F N V

226 GTGCTTATCAGCCGGACACTGGAAAACTTCAGGCCATTGCTGCG  
V L I S R T L E K L Q A I A A

271 GAGATTGAGTGGACTATAGGAAGTACTGTGAAGATAATACAAGCA  
E I E W T I G S T V K I I Q A

316 GATTTTGCCAAAGATGACATCTACGAGTATTTAAAGAAAACTT  
D F A K D D I Y E Y I K E K L

361 AAAGGCTTAGAAATTGGAATTTTAGTCAACAATGTTGGAATGCTT  
K G L E I G I L V N N V G M L

406 CCAAACCTTCTCCCAAGCCATTTCCTTAACACGCCAGATGACTTC  
P N L L P S H F L N T P D D F

451 CAGAGCCTCATCCACTGTAACATCACCTCAGTTGTGAAGATGACA  
Q S L I H C N I T S V V K M T

496 CAGCTGATTCTGAAACACATGAAATCAAGGCAGAAAGGTCTCATC  
Q L I L K H M K S R Q K G L I

541 TTGAACATATCTTCCGGGGCGGCCCTCTTCCCTGGCCTCTGTAC  
L N I S S G A A L F P W P L Y

586 TCCACGTATTGAGCTTCCAAGGCTTTTGTGTACATTTTCCAAG  
S T Y S A S K A F V Y T F S K

631 GCACTGCAAGCAGAATATAAGGAGAAGGAATCATCCAGGTG  
A L Q A E Y K E K G I I I Q V

676 TTGACCCCATATGCTATTTCAACTCCGATGACAAAGTGCTAAAT  
L T P Y A I S T P M T K C L N

721 ACCAACATGATAACCAAGACTGCTGATGAGTTTGTAAAGAATCA  
T N M I T K T A D E F V K E S

766 CTGAATTATGTCACGATTGGAGACGAAACCTGTGGCTGCCTCACC  
L N Y V T I G D E T C G C L T

811 CATGAAATCTTGGCTACCATCTAAGCCTGATCCCATCGTGGGCC  
H E I L A I L S L I P S W A

856 TTCTACAGCAGTGTGTTTCAGAAGATGCTGCTGACTCGTTACGTG  
F Y S S V F Q K M L L T R Y V

901 GACTACCTCAAGAAGAATGCCAACATCAGATAG TGCTGGTGAAGT  
D Y L K K N A N I R \*  
CGTGTGCCATCCAGCATTGCTTTCCTCACCAGATTCTGCGTTGGCCA  
CAGAGGACACAGGAACAGACCAGTACCTTTTACTTCCCTGAAACTG  
GAG

**Figure S2** Nucleotide and deduced amino acid sequence of ovine HSD17B3. Positions of nucleotide sequences are indicated on left side. \*Stop codon. Primers used in RT-PCR analyses are shown by the boxes. Shaded nucleotides are primers used for cloning. Amino acids different with the data of XM\_042243038 are indicated by the circles.

**Table S1.** Primers used in each experiment.

| PCR primers                                   | Forward primers                                     | Reverse primers                                    |
|-----------------------------------------------|-----------------------------------------------------|----------------------------------------------------|
| <b>RT-PCR</b><br>ovine HSD17B3<br>ovine GAPDH | F- ctcccaagccatttccttaac<br>F- gtgatgctggtgctgagtac | R- tcagcagcatcttctgaaaca<br>R- gtagaagagtgagtgtcgc |
| <b>cloning</b><br>ovine HSD17B3               | F- ccaggtctgaaacagcatctgc                           | R- ctccagtttcagggaagtaaaaggta                      |

**Table S2.** HSD17B3/Hsd17b3 nucleotide and deduced amino acid identities in ovine compared with other species.

| Species | Sequence data  | Nucleotide<br>sequence<br>identity (%) | Amino acid<br>sequence<br>identity(%) |
|---------|----------------|----------------------------------------|---------------------------------------|
| Goat    | XM_005684148.2 | 98.82                                  | 98.39                                 |
| Bovine  | NM_001076439.2 | 96.14                                  | 93.61                                 |
| Porcine | NM_001244790.1 | 89.14                                  | 83.18                                 |
| Cat     | XM_003995460.5 | 86.71                                  | 83.81                                 |
| Dog     | XM_025423094.1 | 85.32                                  | 81.62                                 |
| Human   | NM_000197.2    | 84.46                                  | 79.13                                 |
| Monkey  | NM_001266504.2 | 84.46                                  | 77.88                                 |
| Donkey  | XM_014856940.1 | 83.90                                  | 78.62                                 |
| Horse   | XM_023627093.1 | 80.41                                  | 73.91                                 |
| Rabbit  | XM_002708264.3 | 79.53                                  | 73.56                                 |
| Rat     | NM_054007.1    | 77.93                                  | 71.12                                 |
| Mouse   | NM_008291.3    | 77.72                                  | 71.87                                 |
| Chicken | XM_425046.6    | 66.49                                  | 57.86                                 |
